# Supplementary material for: Lenvatinib activates anti-tumor immunity by suppressing immunoinhibitory infiltrates in the tumor microenvironment of advanced hepatocellular carcinoma
Source: Springer Nature journal article supplement (doi:10.1038/s43856-023-00390-x), 2023-10-25
Supplement: MOESM1 [file 43856_2023_390_MOESM1_ESM.pdf]

## **Description of Additional Supplementary Files**

**File Name:** Supplementary Data 1

**Description:** Annotations for the nCounter Tumor Signaling 360 Panel

**File Name:** Supplementary Data 2

**Description:** TCGA-TME classification platform

**File Name:** Supplementary Data 3

**Description:** The main source data for the figures
